# Supplementary material
Source: Springer Nature journal article supplement (https://www.springermedizin.de/resource/supplementary/12936_2010_1589_MOESM2_ESM.pdf/9542264)

1 2 3 4 5 6 7 8 9 10 11 12 13 14 15 LM

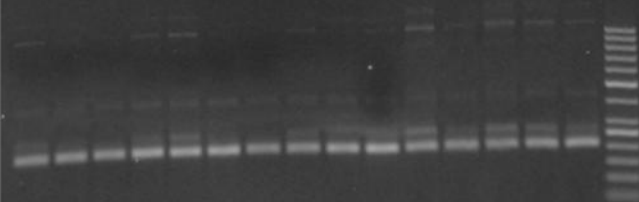

16 17 18 19 20 21 22 23 24 LM

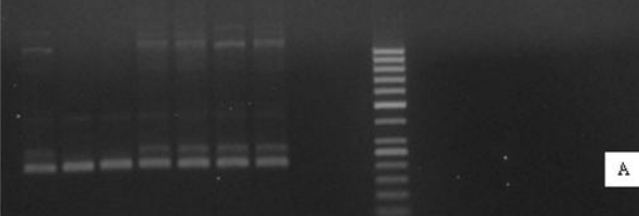

A

1 2 3 4 5 6 7 8 9 10 11 12 13 14 15 LM

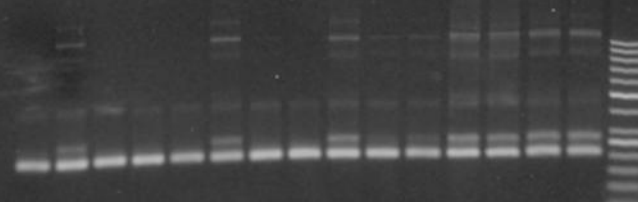

16 17 LM

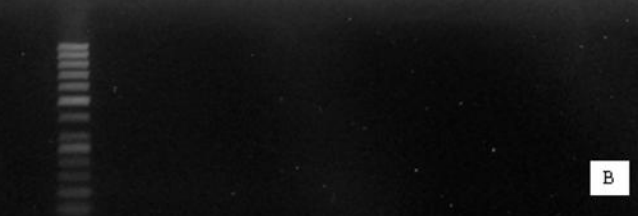

B

Supplement: MOESM2 [file 9542264]
